# Supplementary material for: Deubiquitinase CYLD acts as a negative regulator of dopamine neuron survival in Parkinson’s disease
Source: PubMed Central journal article supplement — Sci Adv. 2022 Apr 1;8(13):eabh1824. doi: 10.1126/sciadv.abh1824 (PMC10938605; doi:10.1126/sciadv.abh1824), 2022-04-01
Supplement: sciadv.abh1824_sm.pdf [file sciadv.abh1824_sm.pdf]

Supplementary Materials for

**Deubiquitinase CYLD acts as a negative regulator of dopamine neuron survival in Parkinson's disease**

Sheila K. Pirooznia, Hu Wang, Nikhil Panicker, Manoj Kumar, Stewart Neifert, Mohamad Aasif Dar, Evan Lau, Bong Gu Kang, Javier Redding-Ochoa, Juan C. Troncoso, Valina L. Dawson\*, Ted M. Dawson\*

\*Corresponding author. Email: vdawson@jhmi.edu (V.L.D.); tdawson@jhmi.edu (T.M.D.)

Published 1 April 2022, *Sci. Adv.* **8**, eabh1824 (2022)

DOI: 10.1126/sciadv.abh1824

**The PDF file includes:**

Figs. S1 to S6  
Tables S1 to S3  
Legends for movies S1 to S3

**Other Supplementary Material for this manuscript includes the following:**

Movies S1 to S3

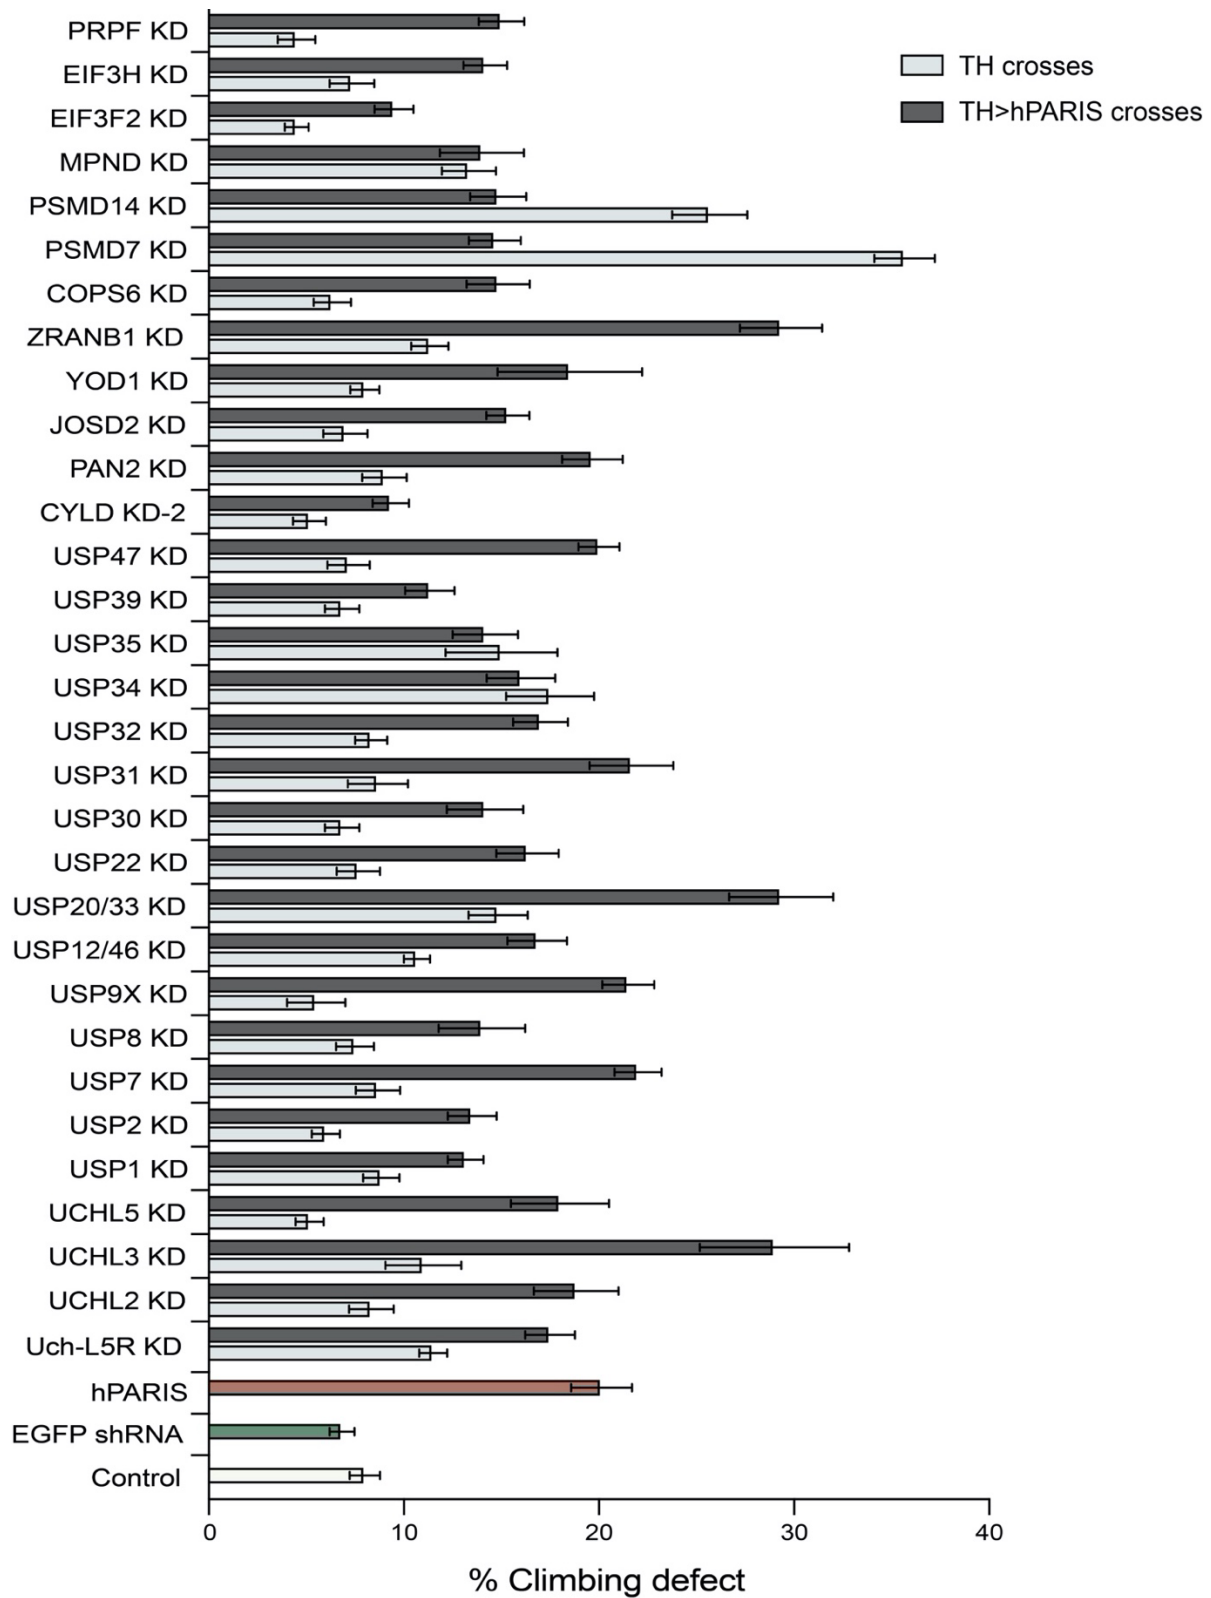

**Fig S1: Genome-wide RNAi screen in *Drosophila* for DUBs that modify hPARIS induced climbing deficits.** Summary of DUBs that modified climbing deficits induced by dopaminergic accumulation of hPARIS. TH-Gal4/+ flies served as control. TH-Gal4 mediated EGFP shRNA

induction served as non-target control for shRNA response. N=60 flies per group at 20-days of age. See also Table S2.

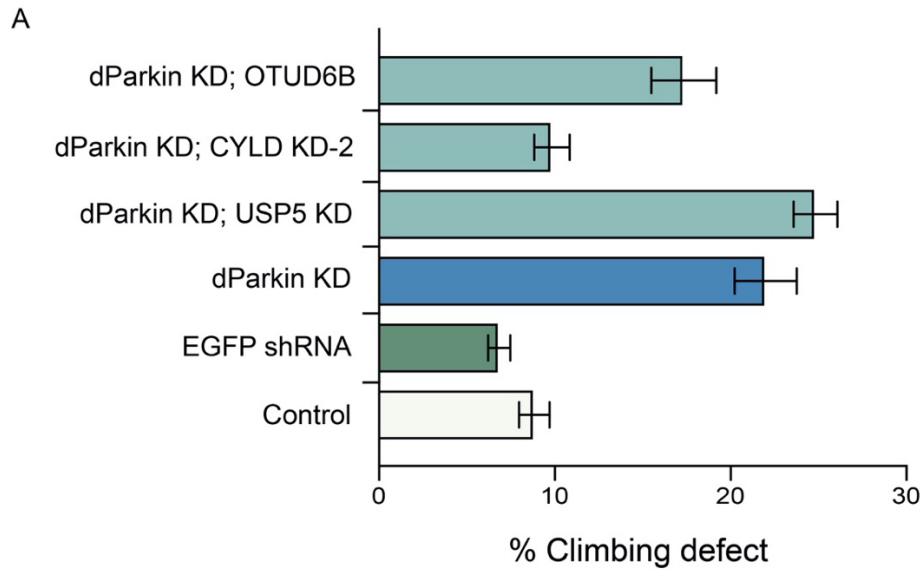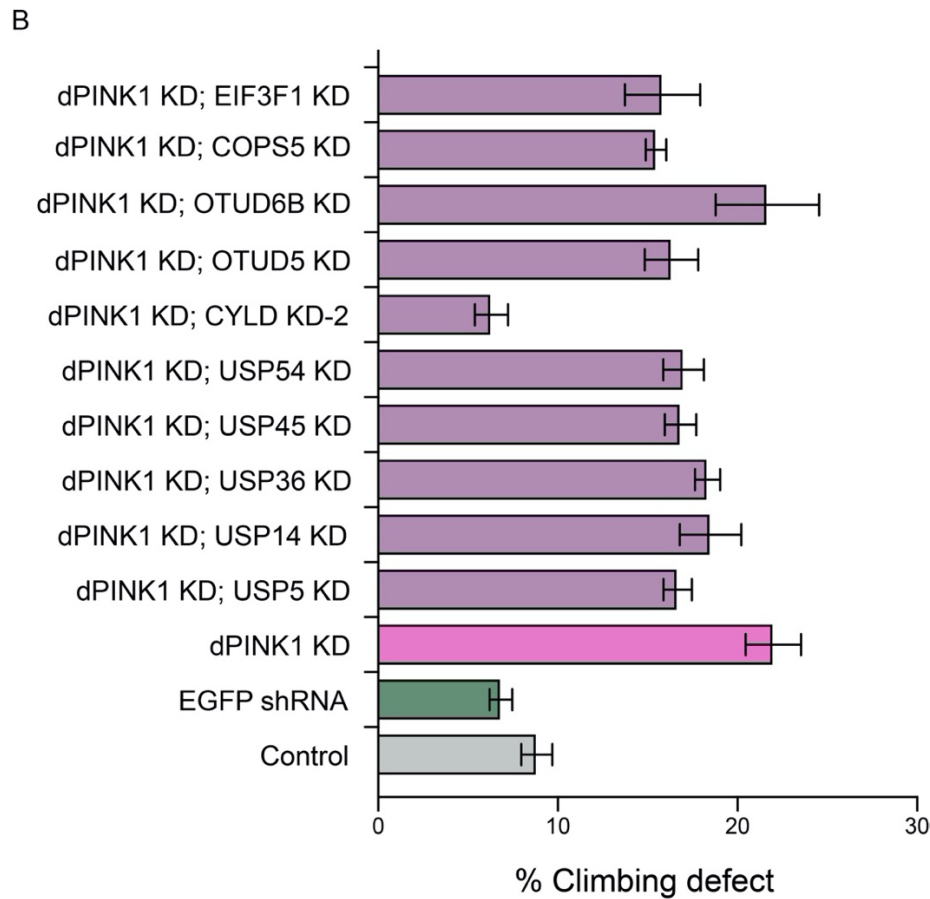

**Fig S2: Secondary screens under conditions of parkin or PINK1 KD to identify modifiers of climbing deficits.** A) Summary of DUB candidates from primary screen scored for suppression of climbing deficits induced by dopaminergic KD of parkin. B) Summary of DUB candidates

from primary screen scored in PINK1 KD flies for their modifying effect on climbing deficits. TH-Gal4/+ flies served as control. TH-Gal4 mediated EGFP shRNA induction served as non-target control for shRNA response. N=60 flies per group at 20-days of age. See also Table S3.

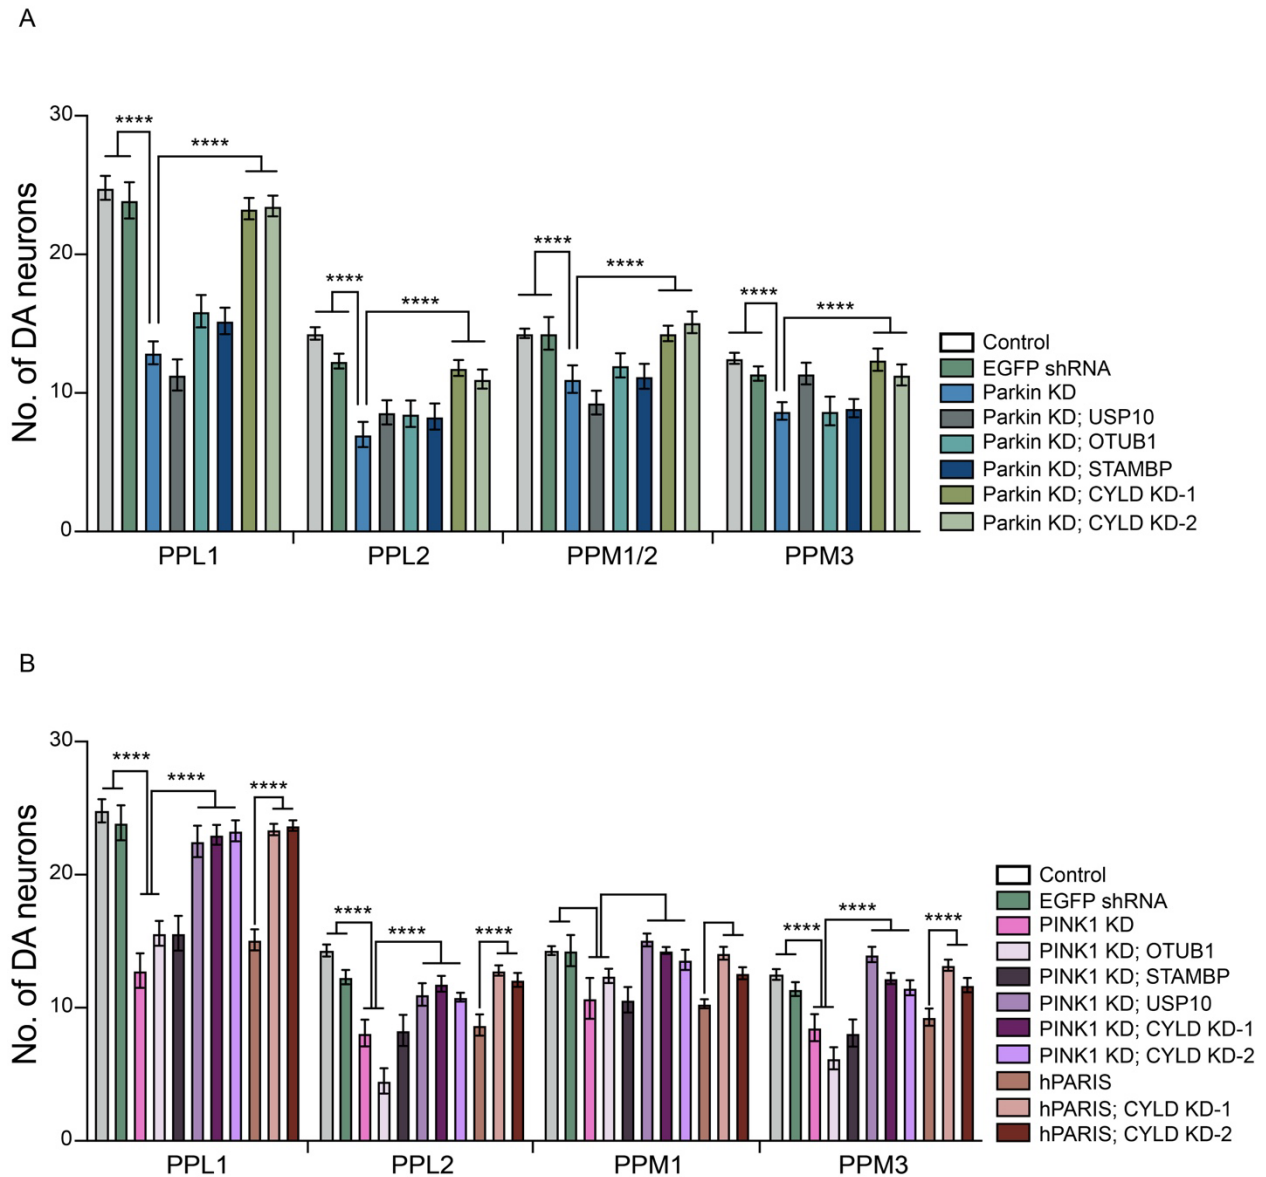

**Fig S3: CYLD knockdown suppresses dopaminergic neurodegeneration in *Drosophila* under conditions of parkin or PINK1 insufficiency.** A) Quantification of DA neuron number in PPL1, PPL2, PPM1/2, and PPM3 dopaminergic clusters in the indicated genotypes under conditions of parkin KD. B) Summary of dopamine neuron quantification in the same dopaminergic clusters as (A) under conditions of PINK1 KD in the indicated genotypes. TH-Gal4/+ flies served as control. TH-Gal4 mediated EGFP shRNA induction served as non-target control for shRNA response. N=10 flies per group at 20-days of age. Quantitative data = mean  $\pm$  SEM. One-way ANOVA \* $p < 0.05$ , \*\* $p < 0.01$ , \*\*\*  $p < 0.001$ , \*\*\*\* $p < 0.0001$ .

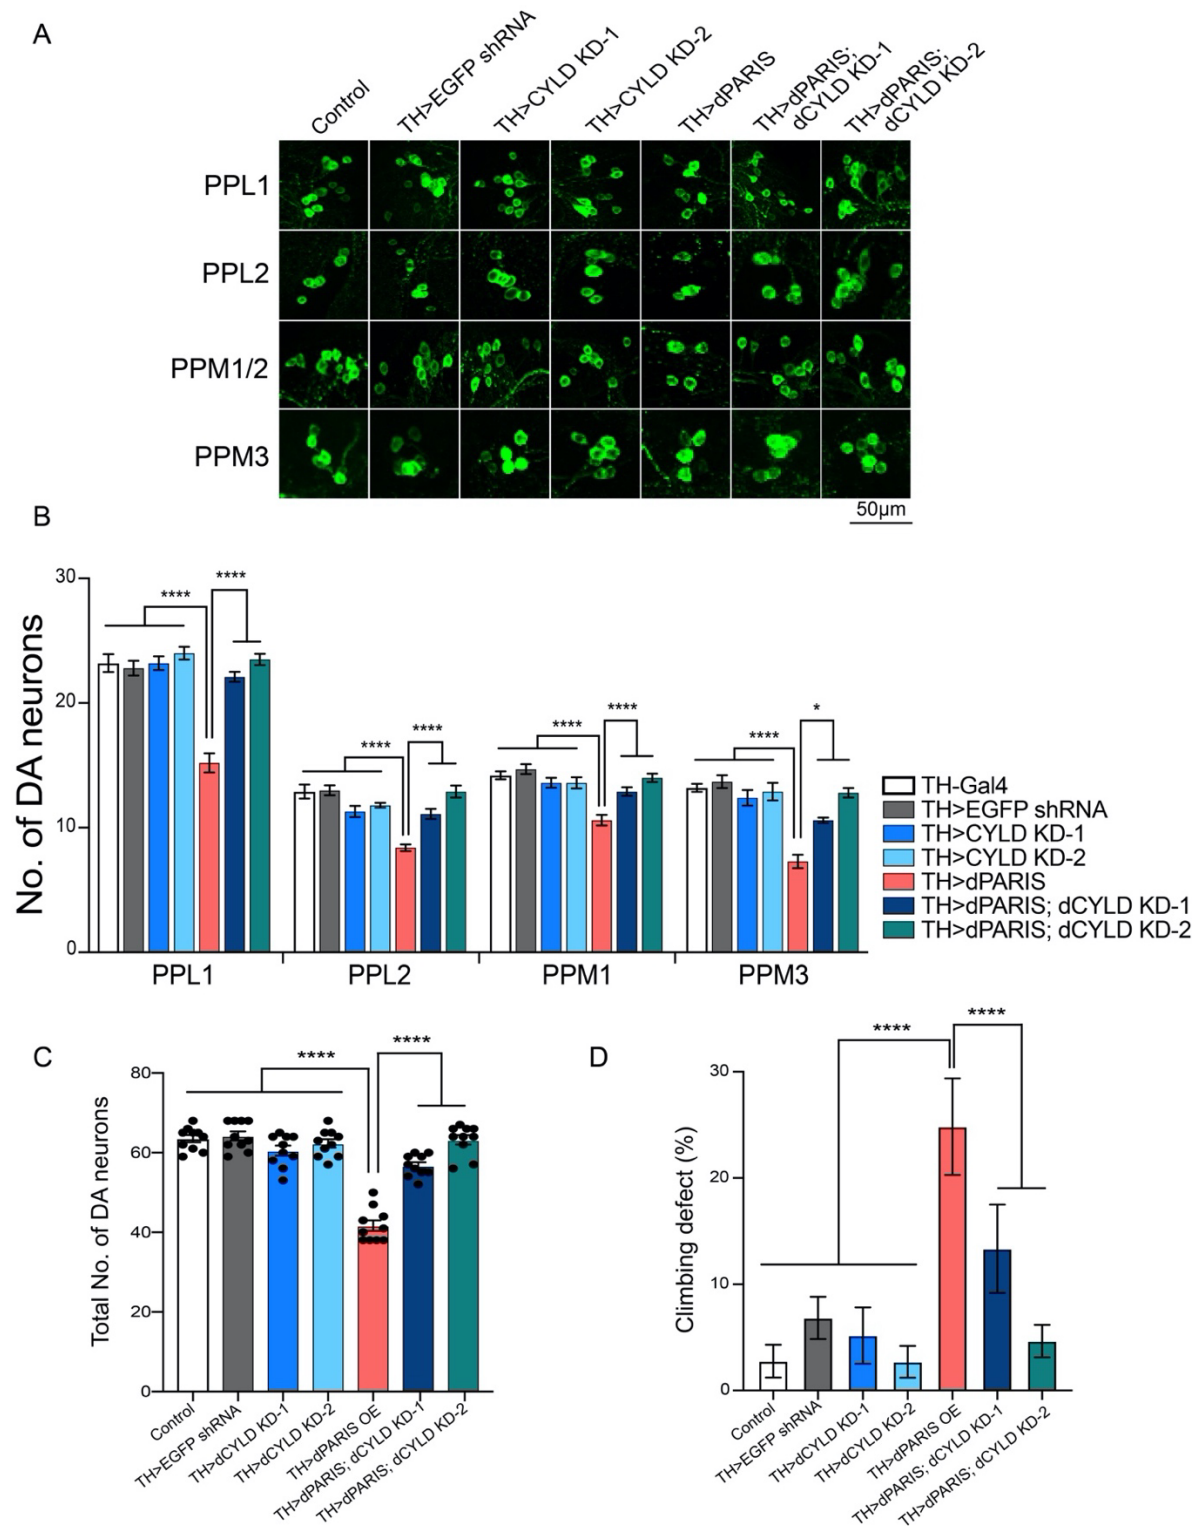

**Fig S4: CYLD knockdown suppresses dPARIS induced dopaminergic neurotoxicity in *Drosophila*.** A) Representative confocal images of individual dopamine neurons in PPL1, PPL2, PPM1/2, and PPM3 DA neuron clusters in the indicated genotypes at 30-days of age. Scale = 500  $\mu$ M. B) Quantification of dopamine neuron numbers in the individual PPL1, PPL2, PPM1/2, and PPM3 clusters for the indicated genotypes on day 30. Observed rescue effects verified using

two independent shRNA fly lines (KD-1 and KD-2) targeting dCYLD. C) Quantification of total dopamine neuron numbers in the indicated genotypes, age group same as B. N=10 flies per indicated genotype. D) Climbing performance in the indicated genotypes on day 30. N=45-60 flies per group. TH-Gal4/+ flies served as control. TH-Gal4 mediated GFP shRNA induction served as non-target control for shRNA response. Quantitative data = mean  $\pm$  SEM. One-way ANOVA \*p < 0.05, \*\*p < 0.01, \*\*\* p < 0.001, \*\*\*\*p < 0.0001.



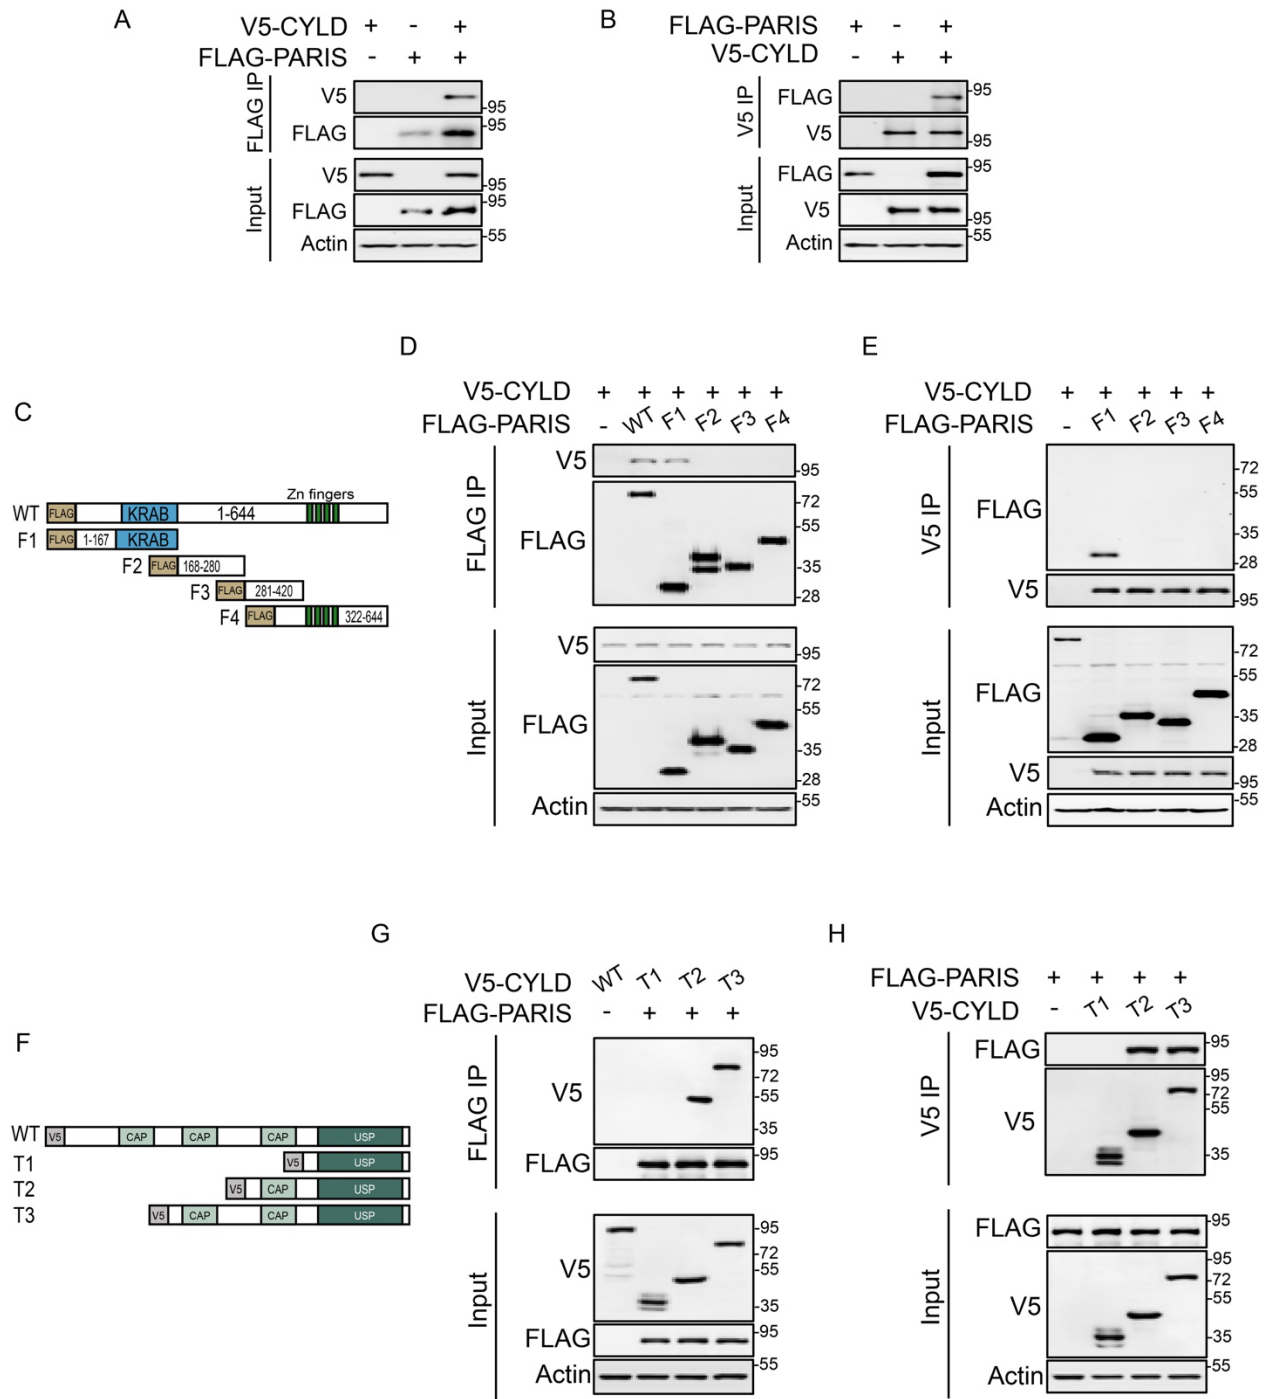

**Fig S5: Mapping of protein interaction domains in PARIS and CYLD.** A) Co-immunoprecipitation of N-terminally V5-tagged CYLD by N-terminally FLAG-tagged PARIS in SH-SY5Y cells using anti-FLAG antibodies. Similar results observed in three independent experiments. B) Reciprocal co-immunoprecipitation using anti-V5 antibodies verify interaction between PARIS and CYLD in SH-SY5Y cells transfected with indicated transgenes. N=3 independent experiments. C) Schematic of N-terminally FLAG tagged truncated fragments of PARIS used for mapping CYLD binding region in PARIS. D) Co-immunoprecipitation

experiments using the indicated truncated fragments of PARIS show that PARIS interacts with CYLD at its N-terminus (Fragment F1). N=3. E) Schematic of N-terminally V5 tagged truncated fragments of CYLD used for mapping PARIS binding region in CYLD. E) Co-immunoprecipitation experiments using the indicated truncated fragments of CYLD show that CYLD binds PARIS at its C-terminus in the region spanning its third CAP domain (Fragment F1). N=3.

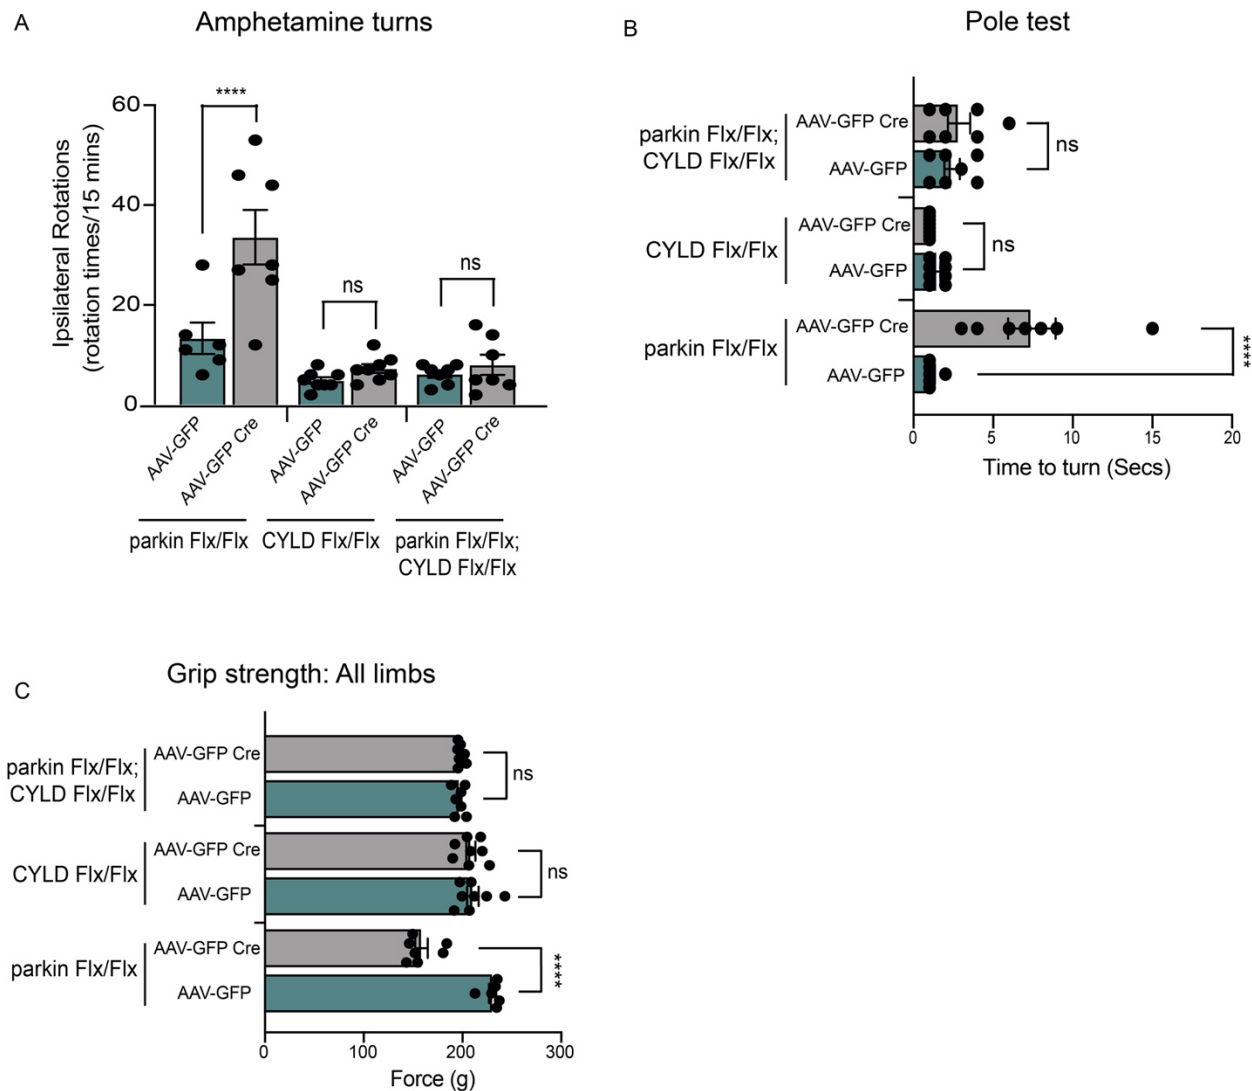

**Fig S6: CYLD knockdown ameliorates behavioral deficits under conditions of parkin insufficiency.** A) Amphetamine induced ipsilateral turns in indicated groups. B) Pole test measuring time to turn in indicated groups. C) Grip strength test measuring force in all limbs in indicated injection groups. Quantitative data = mean  $\pm$  SEM with Tukey post-hoc test. One-way ANOVA \* $p < 0.05$ , \*\* $p < 0.01$ , \*\*\* $p < 0.001$ , \*\*\*\* $p < 0.0001$ .

**Table S1. List of DUB RNAi lines used in genome-wide RNAi screen**

| No. | Flybase ID  | Human homolog<br>(Gene Symbol) | DUB family                                | Fly line used | Source |
|-----|-------------|--------------------------------|-------------------------------------------|---------------|--------|
| 1   | FBgn0030370 | Uch-L5R                        | Ubiquitin C-terminal Hydrolase            | 330593        | VDRC   |
| 2   | FBgn0262166 | UCHL2                          |                                           | v107757       | VDRC   |
| 3   | FBgn0010288 | UCHL3                          |                                           | 26468         | VDRC   |
| 4   | FBgn0011327 | UCHL5                          |                                           | 35433         | BDSC   |
| 5   | FBgn0028476 | USP1                           | Ubiquitin specific Protease               | 28356         | BDSC   |
| 6   | FBgn0031187 | USP2                           |                                           | 104382        | VDRC   |
| 7   | FBgn0035402 | USP5                           |                                           | 31886         | BDSC   |
| 8   | FBgn0030366 | USP7                           |                                           | 34708         | BDSC   |
| 9   | FBgn0038862 | USP8                           |                                           | 38982         | BDSC   |
| 10  | FBgn0005632 | USP9X                          |                                           | 35728         | BDSC   |
| 11  | FBgn0052479 | USP10                          |                                           | 36897         | BDSC   |
| 12  | FBgn0039025 | USP12/46                       |                                           | 35110 (MiMIC) | BDSC   |
| 13  | FBgn0032216 | USP14                          |                                           | 53262         | BDSC   |
| 14  | FBgn0033916 | USP20/33                       |                                           | 42609         | VDRC   |
| 15  | FBgn0013717 | USP22                          |                                           | 28725         | BDSC   |
| 16  | FBgn0029819 | USP30                          |                                           | 110616        | VDRC   |
| 17  | FBgn0050421 | USP31                          |                                           | 33726         | VDRC   |
| 18  | FBgn0036913 | USP32                          |                                           | 18981         | VDRC   |
| 19  | FBgn0039214 | USP34                          |                                           | 27517         | VDRC   |
| 20  | FBgn0033738 | USP35                          |                                           | 28960         | VDRC   |
| 21  | FBgn0260936 | USP36                          |                                           | 33406         | BDSC   |
| 22  | FBgn0030969 | USP39                          |                                           | 110535        | VDRC   |
| 23  | FBgn0029763 | USP45                          |                                           | 110286        | VDRC   |
| 24  | FBgn0016756 | USP47                          |                                           | 44645         | BDSC   |
| 25  | FBgn0000542 | USP54                          | 106671                                    | VDRC          |        |
| 26  | FBgn0032210 | CYLD                           | 101414; 40840                             | VDRC;<br>BDSC |        |
| 27  | FBgn0033352 | PAN2                           | 53249                                     | BDSC          |        |
| 28  | FBgn0029853 | JOSD2                          | Machado Joseph Disease Domain<br>Protease | 108379        | VDRC   |
| 29  | FBgn0003023 | No ortholog                    | Otubain Proteases                         | NA            | NA     |
| 30  | FBgn0031622 | No ortholog                    |                                           | NA            | NA     |
| 31  | FBgn0035593 | YOD1                           |                                           | 21893         | VDRC   |
| 32  | FBgn0032214 | OTUB1                          |                                           | 35615         | BDSC   |
| 33  | FBgn0036180 | OTUD5                          |                                           | 109912        | VDRC   |
| 34  | FBgn0026738 | OTUD6B                         |                                           | 105469        | VDRC   |
| 35  | FBgn0037734 | ZRANB1                         |                                           | 24030         | VDRC   |
| 36  | FBgn0039773 | STAMPB                         | JAMM Domain Proteases                     | 108622        | VDRC   |

|    |             |        |  |        |      |
|----|-------------|--------|--|--------|------|
| 37 | FBgn0027053 | COPSS  |  | 42781  | BDSC |
| 38 | FBgn0028837 | COPS6  |  | 36073  | BDSC |
| 39 | FBgn0002787 | PSMD7  |  | 35411  | BDSC |
| 40 | FBgn0028694 | PSMD14 |  | 33662  | BDSC |
| 41 | FBgn0032348 | MPND   |  | 45530  | VDRC |
| 42 | FBgn0037270 | EIF3F1 |  | 33980  | BDSC |
| 43 | FBgn0033069 | EIF3F2 |  | 108169 | VDRC |
| 44 | FBgn0022023 | EIF3H  |  | 55603  | BDSC |
| 45 | FBgn0033688 | PRPF   |  | 34622  | BDSC |

**Table S2. Statistical comparison of climbing performance of DUB knockdowns in primary screen**

| No. | Targeted DUB | TH crosses   |         |                  | TH; hPARIS crosses |         |                  |
|-----|--------------|--------------|---------|------------------|--------------------|---------|------------------|
|     |              | Significance | Summary | Adjusted p-value | Significance       | Summary | Adjusted p-value |
| 1   | Uch-L5R      | No           | ns      | 0.6557           | No                 | ns      | 0.998            |
| 2   | UCHL2        | No           | ns      | 0.9998           | No                 | ns      | 0.9993           |
| 3   | UCHL3        | No           | ns      | 0.8656           | Yes                | **      | 0.0044           |
| 4   | UCHL5        | No           | ns      | 0.9174           | No                 | ns      | 0.9986           |
| 5   | USP1         | No           | ns      | 0.9994           | No                 | ns      | 0.0641           |
| 6   | USP2         | No           | ns      | 0.9982           | No                 | ns      | 0.0943           |
| 7   | USP5         | No           | ns      | 0.2191           | Yes                | ****    | <0.0001          |
| 8   | USP7         | No           | ns      | 0.9996           | Yes                | **      | 0.0016           |
| 9   | USP8         | No           | ns      | 0.9997           | No                 | ns      | 0.1607           |
| 10  | USP9X        | No           | ns      | 0.9796           | No                 | ns      | 0.9992           |
| 11  | USP10        | No           | ns      | 0.6557           | Yes                | ****    | <0.0001          |
| 12  | USP12/46     | No           | ns      | 0.9552           | No                 | ns      | 0.9591           |
| 13  | USP14        | No           | ns      | 0.9984           | Yes                | ****    | <0.0001          |
| 14  | USP20/33     | No           | ns      | 0.0077           | Yes                | **      | 0.0025           |
| 15  | USP22        | No           | ns      | 0.9998           | No                 | ns      | 0.8481           |
| 16  | USP30        | No           | ns      | 0.9991           | No                 | ns      | 0.1895           |
| 17  | USP31        | No           | ns      | 0.9996           | No                 | ns      | 0.9991           |
| 18  | USP32        | No           | ns      | 0.9998           | No                 | ns      | 0.999            |
| 19  | USP34        | No           | ns      | <0.0001          | No                 | ns      | 0.7387           |
| 20  | USP35        | No           | ns      | 0.0997           | No                 | ns      | 0.1895           |
| 21  | USP36        | No           | ns      | 0.0055           | Yes                | **      | 0.0037           |
| 22  | USP39        | No           | ns      | >0.9999          | Yes                | **      | 0.0049           |
| 23  | USP45        | No           | ns      | 0.9991           | Yes                | ****    | <0.0001          |
| 24  | USP47        | No           | ns      | 0.9994           | No                 | ns      | >0.9999          |
| 25  | USP54        | No           | ns      | 0.2191           | Yes                | ***     | 0.0009           |
| 26  | CYLD         | No           | ns      | 0.9986           | Yes                | ***     | 0.0005           |
| 27  | PAN2         | No           | ns      | 0.9993           | No                 | ns      | 0.9997           |
| 28  | JOSD2        | No           | ns      | 0.9993           | No                 | ns      | 0.499            |
| 29  | YOD1         | No           | ns      | >0.9999          | No                 | ns      | 0.999            |
| 30  | OTUB1        | No           | ns      | >0.9999          | 0.9986             | ****    | <0.0001          |
| 31  | OTUD5        | No           | ns      | 0.9996           | Yes                | ****    | <0.0001          |
| 32  | OTUD6B       | No           | ns      | 0.0028           | Yes                | ***     | 0.0009           |
| 33  | ZRANB1       | No           | ns      | 0.7312           | Yes                | **      | 0.0025           |
| 34  | STAMPB       | No           | ns      | 0.5068           | Yes                | ****    | <0.0001          |

|    |        |    |    |         |     |      |         |
|----|--------|----|----|---------|-----|------|---------|
| 35 | COPS5  | No | ns | 0.9996  | Yes | ***  | 0.0007  |
| 36 | COPS6  | No | ns | 0.9986  | No  | ns   | 0.343   |
| 37 | PSMD7  | No | ns | <0.0001 | No  | ns   | 0.2986  |
| 38 | PSMD14 | No | ns | <0.0001 | No  | ns   | 0.343   |
| 39 | MPND   | No | ns | 0.0932  | No  | ns   | 0.1607  |
| 40 | EIF3F1 | No | ns | 0.9982  | Yes | **** | <0.0001 |
| 41 | EIF3F2 | No | ns | 0.6557  | Yes | ***  | 0.0002  |
| 42 | EIF3H  | No | ns | 0.999   | No  | ns   | 0.1895  |
| 43 | PRPF   | No | ns | 0.6557  | No  | ns   | 0.3914  |

One-way ANOVA analysis with Tukey's post-hoc multiple correction comparing climbing performance of the DUB knockdowns in the primary screen employing dopaminergic overexpression of PARIS. \*\*p < 0.01, \*\*\* p < 0.001, \*\*\*\*p < 0.0001, ns – not significant

**Table S3. Statistical comparison of climbing performance of DUB knockdowns in secondary screen.**

| No. | Targeted DUB | TH>Parkin KD crosses |         |                  | TH>PINK1 KD crosses |         |                  |
|-----|--------------|----------------------|---------|------------------|---------------------|---------|------------------|
|     |              | Significance         | Summary | Adjusted p-value | Significance        | Summary | Adjusted p-value |
| 1   | USP5         | No                   | ns      | 0.6711           | No                  | ns      | 0.0609           |
| 2   | USP10        | Yes                  | ****    | <0.0001          | Yes                 | ****    | <0.0001          |
| 3   | USP14        | Yes                  | ****    | <0.0001          | No                  | ns      | 0.4597           |
| 4   | USP36        | Yes                  | ****    | <0.0001          | No                  | ns      | 0.3994           |
| 5   | USP45        | Yes                  | ****    | <0.0001          | No                  | ns      | 0.0763           |
| 6   | USP54        | Yes                  | ****    | <0.0001          | No                  | ns      | 0.0947           |
| 7   | CYLD         | Yes                  | ***     | 0.0004           | Yes                 | ****    | <0.0001          |
| 8   | OTUB1        | Yes                  | ****    | <0.0001          | Yes                 | ****    | <0.0001          |
| 9   | OTUD5        | Yes                  | ****    | <0.0001          | Yes                 | *       | 0.038            |
| 10  | OTUD6B       | No                   | ns      | 0.1065           | No                  | ns      | 0.9998           |
| 11  | STAMBP       | Yes                  | ****    | <0.0001          | Yes                 | ****    | <0.0001          |
| 12  | COPS5        | Yes                  | ****    | <0.0001          | Yes                 | **      | 0.0097           |
| 13  | EIF3F1       | Yes                  | ***     | 0.0003           | Yes                 | *       | 0.0177           |

One-way ANOVA with Tukey's post-hoc multiple correction comparing climbing performance of DUB knockdowns in the secondary screen employing dopaminergic knockdown of parkin or PINK1. \*p<0.05, \*\*p < 0.01, \*\*\* p < 0.001, \*\*\*\*p < 0.0001, ns – not significant



## **Supplemental Videos**

**Video 1:** Rescue of climbing deficits in human PARIS (hPARIS) flies by two independent dCYLD knockdown lines

**Video 2:** Rescue of climbing deficits in Drosophila PARIS (dPARIS) flies by two independent dCYLD knockdown lines

**Video 3:** Representative videos of pole test analysis in CYLD Flx/Flx, parkin Flx/Flx, and parkin Flx/Flx; CYLD Flx/Flx mice stereotactically injected with AAV-GFP or AAV-GFP Cre as indicated.
